# Supplementary material
Source: Springer Nature journal article supplement (https://www.springermedizin.de/resource/supplementary/12984_2009_196_MOESM1_ESM.pdf/9605508)
Supplement: MOESM1 [file 9605508]

**Cadence** n=51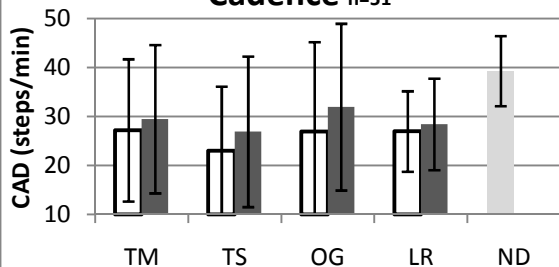**Symmetry Index** n=51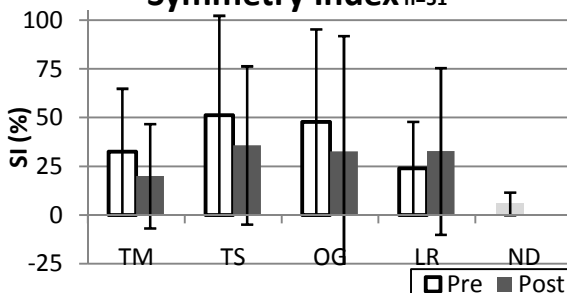**Step Length** n=51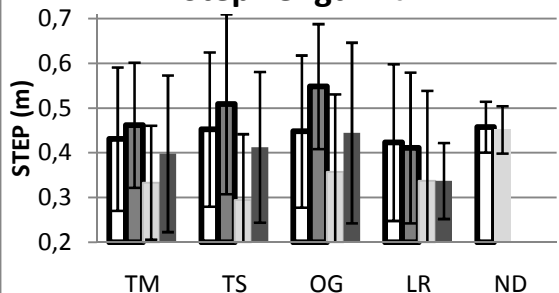**Intralimb Coordination** n=38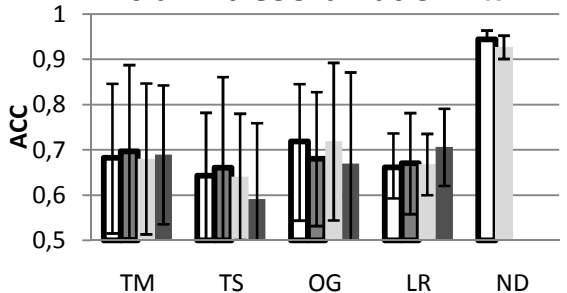**Stride Length** n=45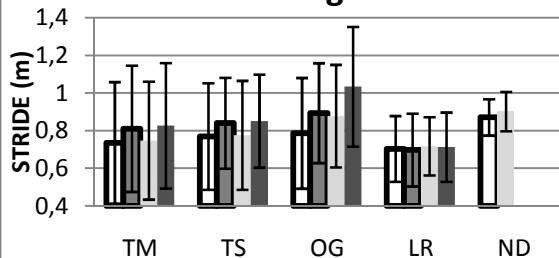**Timing of Onset Knee** n=27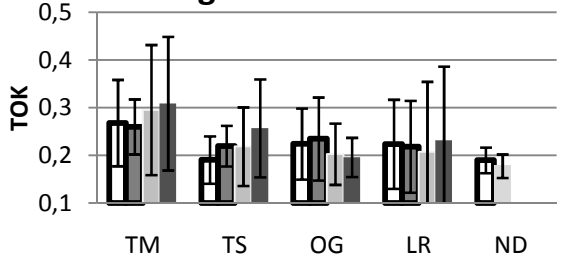

Pre Stronger 
  Post stronger 
  Pre Weaker 
  Post Weaker
